# Supplementary material
Source: PubMed Central journal article supplement (PMC8937595)
Supplement: 7272_Appendix.pdf [file 7272_Appendix.pdf]

*Sayyid RK, et al. Active surveillance in favorable intermediate-risk prostate cancer patients: Predictors of deferred intervention and treatment choice*

|                                                                                   |      |           |                  |      |           |                  |      |           |                  |
|-----------------------------------------------------------------------------------|------|-----------|------------------|------|-----------|------------------|------|-----------|------------------|
| Southeast                                                                         | 0.84 | 0.73–0.97 | <b>0.020</b>     | 0.97 | 0.75–1.25 | 0.82             | 0.56 | 0.30–1.09 | 0.058            |
| Midwest                                                                           | 1.78 | 1.32–2.44 | <b>&lt;0.001</b> | 1.43 | 0.95–2.18 | 0.093            | 1.01 | 0.42–2.81 | 0.98             |
| West                                                                              | 0.91 | 0.80–1.04 | 0.17             | 0.89 | 0.71–1.10 | 0.28             | 0.80 | 0.44–1.40 | 0.45             |
| SES quartiles (reference: 1 [lowest])                                             |      |           |                  |      |           |                  |      |           |                  |
| 2                                                                                 | 1.29 | 1.10–1.51 | <b>0.002</b>     | 1.26 | 0.99–1.58 | 0.052            | 1.53 | 0.81–2.98 | 0.20             |
| 3                                                                                 | 1.20 | 1.03–1.39 | <b>0.015</b>     | 1.01 | 0.81–1.26 | 0.94             | 0.87 | 0.51–1.47 | 0.61             |
| 4 (highest)                                                                       | 1.82 | 1.55–2.13 | <b>&lt;0.001</b> | 1.46 | 1.14–1.87 | <b>0.003</b>     | 1.61 | 0.88–3.02 | 0.13             |
| PCa as first cancer diagnosis (reference: previously diagnosed with other cancer) | 1.13 | 0.92–1.37 | 0.25             | 1.41 | 1.03–1.91 | <b>0.028</b>     | 0.90 | 0.28–2.18 | 0.85             |
| PSA (references: 0–5 ng/ml for groups 1 and 3; 10–15 ng/ml for group 2)           |      |           |                  |      |           |                  |      |           |                  |
| 5–10 ng/ml                                                                        | 1.00 | 0.85–1.16 | 0.95             |      |           |                  | 1.05 | 0.64–1.66 | 0.84             |
| 10–20 ng/ml                                                                       |      |           |                  | 1.25 | 0.83–1.86 | 0.27             |      |           |                  |
| Percent cores positive (reference: 0–12.5%)                                       |      |           |                  |      |           |                  |      |           |                  |
| 12.6–25.0%                                                                        | 1.13 | 0.97–1.32 | 0.13             | 1.18 | 0.97–1.44 | 0.10             | 1.03 | 0.55–1.92 | 0.93             |
| 25.1–37.5%                                                                        | 1.38 | 1.19–1.61 | <b>&lt;0.001</b> | 1.37 | 1.10–1.71 | <b>0.005</b>     | 0.62 | 0.35–1.06 | 0.089            |
| 37.6–49.9%                                                                        | 1.37 | 1.15–1.65 | <b>&lt;0.001</b> | 1.81 | 1.27–2.64 | <b>0.001</b>     | 0.75 | 0.37–1.56 | 0.43             |
| cT stage (cT1 as reference for groups 1 and; cT2b for group 3)                    |      |           |                  |      |           |                  |      |           |                  |
| cT2a                                                                              | 3.07 | 2.56–3.72 | <b>&lt;0.001</b> | 4.29 | 3.06–6.17 | <b>&lt;0.001</b> |      |           |                  |
| cT2c                                                                              |      |           |                  |      |           |                  | 17.7 | 11.4–27.3 | <b>&lt;0.001</b> |

CI: confidence interval; NA: not available; OR: odds ratio; PSA: prostate-specific antigen; SEER: Surveillance, Epidemiology, and End Results; SES: socioeconomic status.

*Sayyid RK, et al. Active surveillance in favorable intermediate-risk prostate cancer patients: Predictors of deferred intervention and treatment choice*

| <b>Supplementary Table 2.</b> Predictors of receiving radical prostatectomy versus radiation therapy on univariable logistic regression analysis for favorable intermediate prostate cancer patients by subgroup |                                                                  |               |                  |                                                                              |               |                  |                                                                     |               |                  |
|------------------------------------------------------------------------------------------------------------------------------------------------------------------------------------------------------------------|------------------------------------------------------------------|---------------|------------------|------------------------------------------------------------------------------|---------------|------------------|---------------------------------------------------------------------|---------------|------------------|
|                                                                                                                                                                                                                  | <b>GG2 favorable intermediate-risk cohort (group 1) (n=9224)</b> |               |                  | <b>PSA 10–20 ng/ml favorable intermediate-risk cohort (group 2) (n=2552)</b> |               |                  | <b>cT2b–c favorable intermediate-risk cohort (group 3) (n=8558)</b> |               |                  |
| <b>Variable</b>                                                                                                                                                                                                  | <b>OR</b>                                                        | <b>95% CI</b> | <b>p</b>         | <b>OR</b>                                                                    | <b>95% CI</b> | <b>p</b>         | <b>OR</b>                                                           | <b>95% CI</b> | <b>p</b>         |
| Year of diagnosis (reference: 2010–11)                                                                                                                                                                           |                                                                  |               |                  |                                                                              |               |                  |                                                                     |               |                  |
| 2012–13                                                                                                                                                                                                          | 0.87                                                             | 0.74–1.02     | 0.09             | 0.91                                                                         | 0.66–1.25     | 0.56             | 0.89                                                                | 0.66–1.20     | 0.44             |
| 2014–15                                                                                                                                                                                                          | 0.95                                                             | 0.81–1.11     | 0.53             | 0.90                                                                         | 0.64–1.27     | 0.56             | 0.94                                                                | 0.67–1.33     | 0.71             |
| Age at diagnosis (reference: 30–49 years)                                                                                                                                                                        |                                                                  |               |                  |                                                                              |               |                  |                                                                     |               |                  |
| 50–59                                                                                                                                                                                                            | 0.43                                                             | 0.30–0.61     | <b>&lt;0.001</b> | 0.59                                                                         | 0.23–1.63     | 0.28             | 0.51                                                                | 0.12–1.42     | 0.26             |
| 60–69                                                                                                                                                                                                            | 0.19                                                             | 0.13–0.27     | <b>&lt;0.001</b> | 0.30                                                                         | 0.12–0.83     | <b>0.01</b>      | 0.14                                                                | 0.035–0.38    | <b>&lt;0.001</b> |
| 70–79                                                                                                                                                                                                            | 0.05                                                             | 0.034–0.074   | <b>&lt;0.001</b> | 0.097                                                                        | 0.036–0.28    | <b>&lt;0.001</b> | 0.03                                                                | 0.008–0.092   | <b>&lt;0.001</b> |
| Race (reference: Caucasian)                                                                                                                                                                                      |                                                                  |               |                  |                                                                              |               |                  |                                                                     |               |                  |
| African American                                                                                                                                                                                                 | 0.44                                                             | 0.35–0.54     | <b>&lt;0.001</b> | 0.44                                                                         | 0.27–0.68     | <b>&lt;0.001</b> | 0.87                                                                | 0.60–1.31     | 0.50             |
| Hispanic                                                                                                                                                                                                         | 1.31                                                             | 1.02–1.66     | <b>&lt;0.001</b> | 1.15                                                                         | 0.74–1.74     | 0.52             | 1.05                                                                | 0.65–1.81     | 0.84             |
| Asia/Pacific Islander/American Indian/Alaska Native                                                                                                                                                              | 1.19                                                             | 0.88–1.60     | 0.23             | 0.86                                                                         | 0.48–1.46     | 0.60             | 0.68                                                                | 0.40–1.28     | 0.20             |
| Insurance status (reference: insured)                                                                                                                                                                            |                                                                  |               |                  |                                                                              |               |                  |                                                                     |               |                  |
| Uninsured                                                                                                                                                                                                        | 1.44                                                             | 0.73–2.62     | 0.26             | 0.89                                                                         | 0.26–2.33     | 0.84             | 1.81                                                                | 0.40–32.1     | 0.56             |
| Medicaid                                                                                                                                                                                                         | 0.61                                                             | 0.38–0.92     | 0.024            | 0.60                                                                         | 0.28–1.15     | 0.15             | 0.51                                                                | 0.28–0.96     | <b>0.041</b>     |
| Marital status (reference: married)                                                                                                                                                                              |                                                                  |               |                  |                                                                              |               |                  |                                                                     |               |                  |
| Not married                                                                                                                                                                                                      | 1.52                                                             | 1.28–1.81     | <b>&lt;0.001</b> | 1.26                                                                         | 0.91–1.76     | 0.17             | 2.02                                                                | 1.47–2.73     | <b>&lt;0.001</b> |
| SEER registry region (reference: Northeast)                                                                                                                                                                      |                                                                  |               |                  |                                                                              |               |                  |                                                                     |               |                  |
| Southeast                                                                                                                                                                                                        | 1.03                                                             | 0.85–1.25     | 0.75             | 1.34                                                                         | 0.86–2.12     | 0.20             | 0.82                                                                | 0.56–1.20     | 0.31             |

*Sayyid RK, et al. Active surveillance in favorable intermediate-risk prostate cancer patients: Predictors of deferred intervention and treatment choice*

|                                                                                   |       |             |                |       |             |                |      |           |                |
|-----------------------------------------------------------------------------------|-------|-------------|----------------|-------|-------------|----------------|------|-----------|----------------|
| Midwest                                                                           | 2.74  | 2.13–3.50   | < <b>0.001</b> | 2.76  | 1.58–4.80   | < <b>0.001</b> | 1.05 | 0.61–1.88 | 0.86           |
| West                                                                              | 1.60  | 1.48–1.89   | < <b>0.001</b> | 1.57  | 1.07–2.37   | <b>0.026</b>   | 0.90 | 0.63–1.26 | 0.53           |
| SES quartiles (reference: 1 [lowest])                                             |       |             |                |       |             |                |      |           |                |
| 2                                                                                 | 0.76  | 0.61–0.94   | <b>0.013</b>   | 0.76  | 0.52–1.13   | 0.17           | 1.10 | 0.74–1.66 | 0.63           |
| 3                                                                                 | 1.13  | 0.93–1.36   | 0.22           | 0.96  | 0.66–1.40   | 0.85           | 0.82 | 0.57–1.16 | 0.27           |
| 4 (highest)                                                                       | 1.21  | 1.01–1.46   | <b>0.049</b>   | 0.94  | 0.63–1.38   | 0.75           | 1.22 | 0.83–1.80 | 0.32           |
| PCa as first cancer diagnosis (reference: previously diagnosed with other cancer) | 1.51  | 1.14–2.05   | <b>0.005</b>   | 1.15  | 0.67–2.13   | 0.64           | 2.53 | 1.61–3.81 | <0.001         |
| PSA (references: 0–5 ng/ml for groups 1 and 3; 10–15 ng/ml for group 2)           |       |             |                |       |             |                |      |           |                |
| 5–10 ng/ml                                                                        | 0.48  | 0.41–0.56   | < <b>0.001</b> |       |             |                | 1.06 | 0.78–1.43 | 0.70           |
| 10–20 ng/ml                                                                       |       |             |                | 1.41  | 0.68–3.42   | 0.40           |      |           |                |
| Percent cores positive (reference: 0–12.5%)                                       |       |             |                |       |             |                |      |           |                |
| 12.6–25.0%                                                                        | 0.87  | 0.72–1.03   | 0.11           | 0.70  | 0.51–0.95   | <b>0.025</b>   | 0.62 | 0.39–0.97 | <b>0.038</b>   |
| 25.1–37.5%                                                                        | 0.52  | 0.44–0.63   | < <b>0.001</b> | 0.32  | 0.21–0.48   | < <b>0.001</b> | 0.34 | 0.22–0.51 | < <b>0.001</b> |
| 37.6–49.9%                                                                        | 0.40  | 0.32–0.50   | < <b>0.001</b> | 0.18  | 0.071–0.39  | < <b>0.001</b> | 0.33 | 0.20–0.53 | < <b>0.001</b> |
| cT stage (cT1 as reference for groups 1 and; cT2b for group 3)                    |       |             |                |       |             |                |      |           |                |
| cT2a                                                                              | 144.2 | 109.8–193.4 | < <b>0.001</b> | 234.8 | 141.1–413.3 | < <b>0.001</b> |      |           |                |
| cT2c                                                                              |       |             |                |       |             |                | 35.4 | 26.4–47.5 | < <b>0.001</b> |

CI: confidence interval; NA: not available; OR: odds ratio; PSA: prostate-specific antigen; SEER: Surveillance, Epidemiology, and End Results; SES: socioeconomic status
